# Supplementary material for: Micropropagation of Vaccinium corymbosum L.: An Alternative Procedure for the Production of Secondary Metabolites
Source: MDPI journal article supplement (doi:10.3390/horticulturae8060480), 2022-05-28
Supplement: s1 [file s1]

**Table S1.** Identification of the phenolic compounds from the flavonoid class (flavanols, flavonols) and hydroxycinnamic acids class in the shoot extracts of the *in vitro* highbush blueberry varieties

| Peak No. | Retention time<br>R <sub>t</sub> (min) | UV<br>λ <sub>max</sub><br>(nm) | [M+H] <sup>+</sup><br>(m/z) | Compound                                       | Subclass             |
|----------|----------------------------------------|--------------------------------|-----------------------------|------------------------------------------------|----------------------|
| 1        | 2.93                                   | 278                            | 192                         | Quinic acid                                    | Hydroxycinnamic acid |
| 2        | 10.07                                  | 282, 329                       | 355                         | 3-Caffeoylquinic acid<br>(Neochlorogenic acid) | Hydroxycinnamic acid |
| 3        | 11.93                                  | 282, 329                       | 355                         | 5-Caffeoylquinic acid<br>(Chlorogenic acid)    | Hydroxycinnamic acid |
| 4        | 12.47                                  | 280                            | 291                         | Catechin                                       | Flavanol             |
| 5        | 13.10                                  | 280                            | 291                         | Epicatechin                                    | Flavanol             |
| 6        | 13.42                                  | 282, 329                       | 181, 163                    | Caffeic acid                                   | Hydroxycinnamic acid |
| 7        | 13.77                                  | 280                            | 443, 291                    | Epicatechin-gallate (ECG)                      | Flavanol             |
| 8        | 15.29                                  | 280, 330                       | 369                         | Feruloylquinic acid                            | Hydroxycinnamic acid |
| 9        | 16.09                                  | 258, 356                       | 465, 303                    | Quercetin-glucoside                            | Flavonol             |
| 10       | 19.44                                  | 260, 350                       | 449, 287                    | Kaempferol-glucoside                           | Flavonol             |
| 11       | 21.62                                  | 262, 352                       | 303                         | Quercetin                                      | Flavonol             |

[M+H]<sup>+</sup> = MS fragmentation with ESI (+) module used

UV λ<sub>max</sub> = UV maximum absorbance wavelenght

**Table S2.** Identification of the carotenoid and chlorophyll compounds in the shoot extracts of the *in vitro* highbush blueberry varieties

| Peak No. | Retention time<br>R <sub>t</sub> (min) | λ <sub>max</sub>        | Compound      |
|----------|----------------------------------------|-------------------------|---------------|
| 1        | 5.78                                   | 446, 476                | Lutein        |
| 2        | 6.22                                   | 454, 481                | Zeaxanthin    |
| 3        | 9.61                                   | 453, 598, 645           | Chlorophyll b |
| 4        | 10.71                                  | 412, 431, 581, 616, 663 | Chlorophyll a |
| 5        | 11.94                                  | 434, 527, 600, 654      | Pheophytin b  |
| 6        | 13.18                                  | 410, 505, 535, 609, 666 | Pheophytin a  |
| 7        | 13.87                                  | 453, 480                | βCarotene     |

λ<sub>max</sub> = UV maximum absorbance wavelenght
